# Supplementary material
Source: publisher figshare collection journal article supplement (https://gsapubs.figshare.com/ndownloader/files/22745867)
Supplement: Supplementary file 1 [file 22745867]

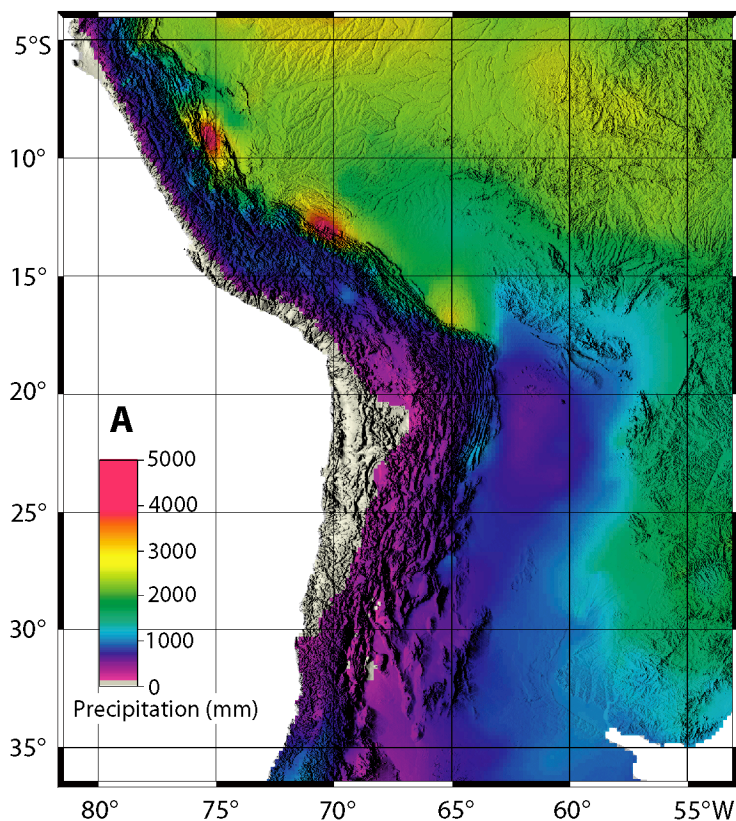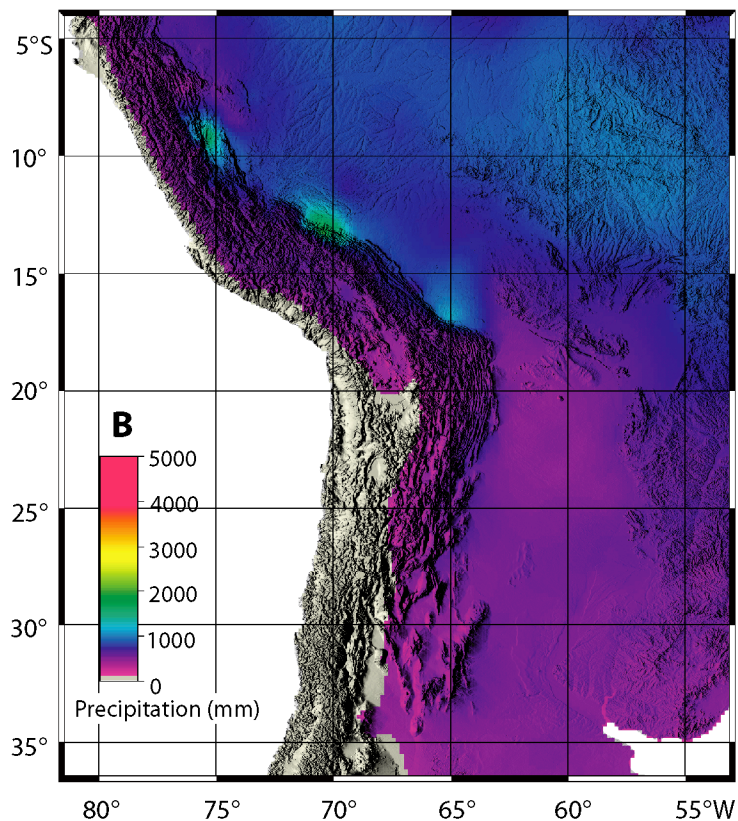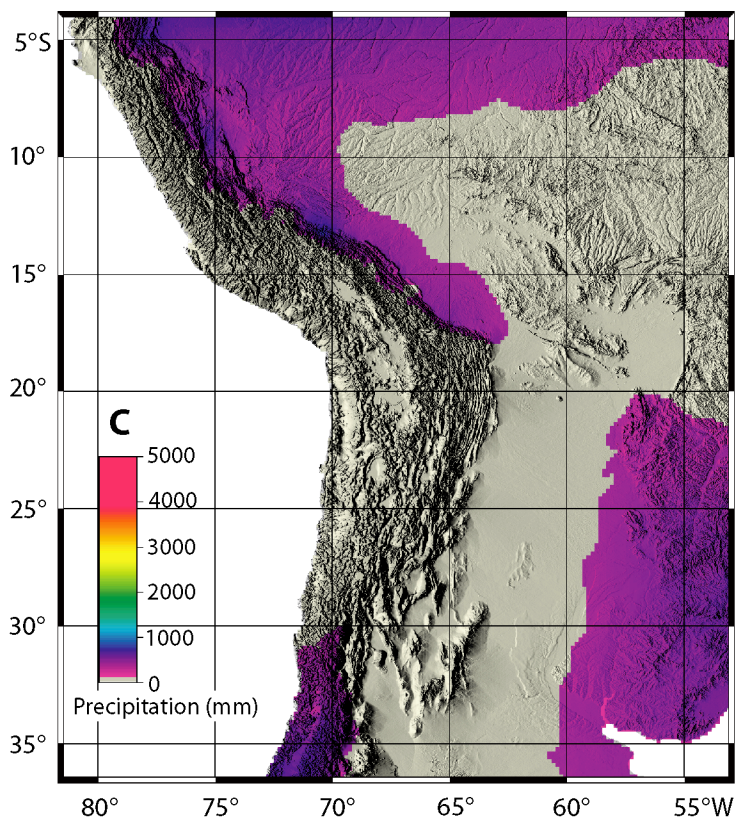

Figure DR-1. 10 minute (~10 km) resolution grid of precipitation in mm for South America from cru6190 30 climatology of New et al. (2002) overlain on GTOPO30 digital topography. Precipitation totals for each period were given in mm/day and have been multiplied by the appropriate number of days. A: Average annual precipitation (365 days). B: Austral summer- December, January, February precipitation (90 days). C: Austral winter- June, July, August precipitation (92 days).

**Reference:**

New, M., Lister, D., Hulme, M., Makin, I., 2002, A high-resolution data set of surface climate over global land areas: Climate Research v.21 p. 1-25.
